# Supplementary material for: Detection of lead chrome green in Tieguanyin tea by laser-induced breakdown spectroscopy
Source: Royal Society of Chemistry journal article supplement (doi:10.1039/d3ja00049d), 2023-01-01
Supplement: d3ja00049d1.pdf [file d3ja00049d1.pdf]

## Electronic Supplementary Information

### 1 Sample preparation of PbI<sub>2</sub>-tea

Another sample was prepared to calculate the limit of detection (LoD) of Pb in tea. Here, PbI<sub>2</sub> reagent (p-OLED, China) with purity > 99.99% was used to prepare a PbI<sub>2</sub> solution with a concentration of 0.001 g/mL. And Tieguanyin tea powder was mixed with the PbI<sub>2</sub> solution, referred to as PbI<sub>2</sub>-tea samples, which was used to calculate the LoD of Pb element. The sample pre-treatment process is shown in Fig. S1. Firstly, 0.001 g/mL PbI<sub>2</sub> solution (heated to 100°C in water bath) was prepared and diluted in different degrees. Then, six parts of 4 g tea powders were weighed to prepare a solid-liquid mixture with Pb content of 1, 10, 50, 100, 1000 and 10000 ppm, respectively. In order to mix tea powder and PbI<sub>2</sub> solution fully and evenly, the mixture was shaken in an ultrasonic cleaner (SK1200H, Kudos, China) for 10 minutes, and then dried in a drying oven (DHG-9146A, Jing Hong, China) at 120°C for 8 hours. After drying, the sample was crushed into powder again, and 2 g powder was pressed into pellet.

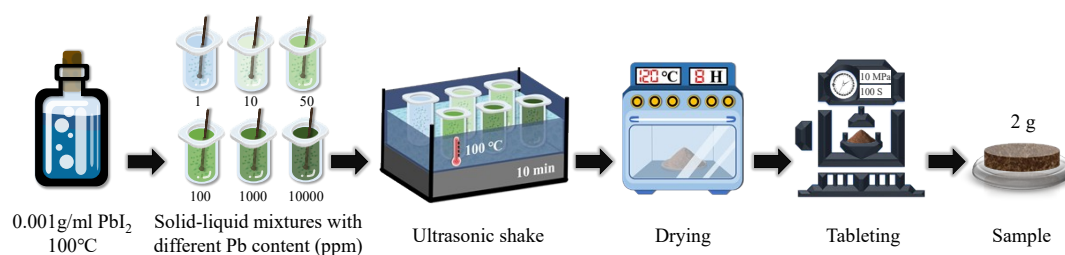

Fig. S1 Schematic diagram of LCG-tea samples pre-treatment process.

### 2 LIBS spectra and elemental analysis

Table S1. All characteristic lines selected in Fig. 3.

| Elements | Wavelength (nm)                                                                                                                                                                                      |
|----------|------------------------------------------------------------------------------------------------------------------------------------------------------------------------------------------------------|
| Ca I     | 422.722, 428.342, 428.969, 429.942, 430.289, 430.843, 431.880, 457.849, 458.084, 458.554, 487.818, 585.756, 610.317, 612.263, 616.263, 643.965, 645.015, 646.298, 647.229, 649.436, 650.015, 657.280 |
| Ca II    | 315.916, 317.992, 393.369, 396.848, 849.759, 854.195, 866.290                                                                                                                                        |
| Si I     | 390.628                                                                                                                                                                                              |
| Si II    | 504.127                                                                                                                                                                                              |
| Sr I     | 421.588, 460.739                                                                                                                                                                                     |
| Sr II    | 407.788                                                                                                                                                                                              |
| O I      | 777.277, 777.549, 844.679                                                                                                                                                                            |
| N I      | 742.454, 744.329, 746.882, 818.580, 818.896, 820.053, 821.102, 821.731, 822.359, 824.343, 856.836, 859.461, 863.034, 868.099, 868.384, 870.373, 871.222, 871.975, 873.009                            |

|      |                                             |
|------|---------------------------------------------|
| H I  | 656.361                                     |
| Na I | 589.002, 589.625                            |
| Mg I | 383.241, 383.860, 516.697, 517.239, 518.320 |
| Al I | 308.255, 309.304, 394.430, 396.169          |
| Fe I | 357.014, 363.085, 370.683, 373.772          |
| Mn I | 403.133, 403.355, 403.504                   |
| K I  | 766.592, 769.940                            |
| Cu I | 324.783, 327.431                            |
| Pb I | 368.375, 405.799                            |
| Cr I | 360.583, 425.473, 452.653                   |

Table S2. Selected CN and CaO radical characteristic lines in Fig. 3.

| Free radical | Wavelength (nm)                                                                                   |
|--------------|---------------------------------------------------------------------------------------------------|
| CN           | 357.908, 358.152, 385.098, 386.178, 387.179, 388.331, 415.217, 415.794, 416.729, 418.093, 419.737 |
| CaO          | 596.822, 598.427, 600.399, 603.350, 605.923, 606.657, 620.726, 622.408, 623.128, 624.805          |

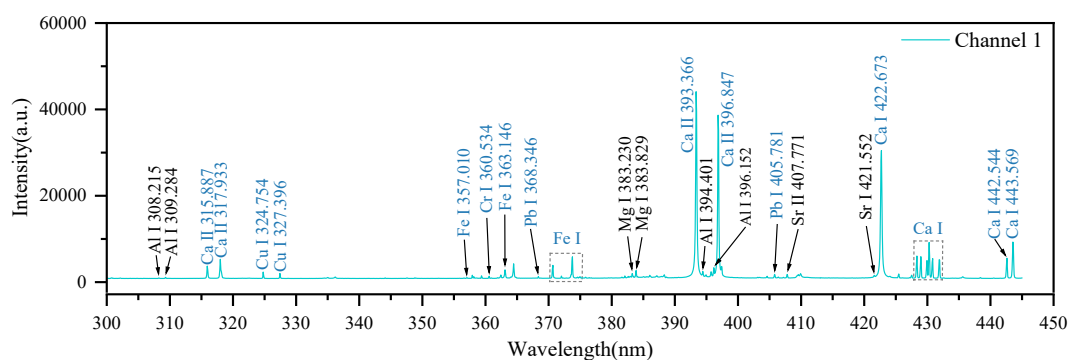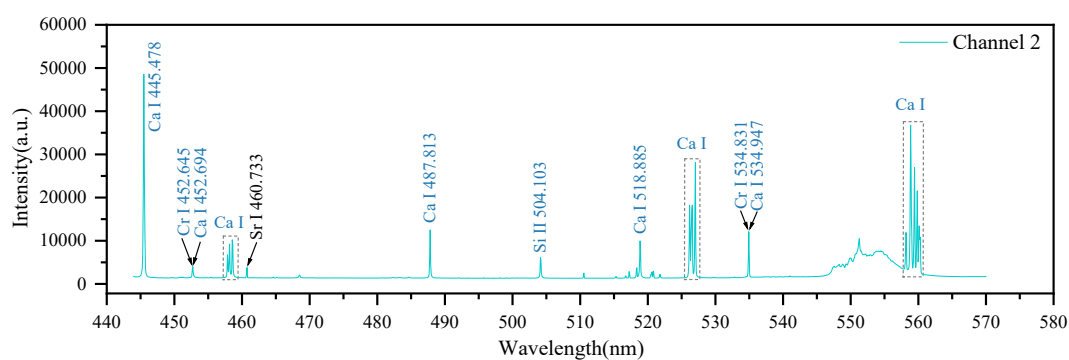

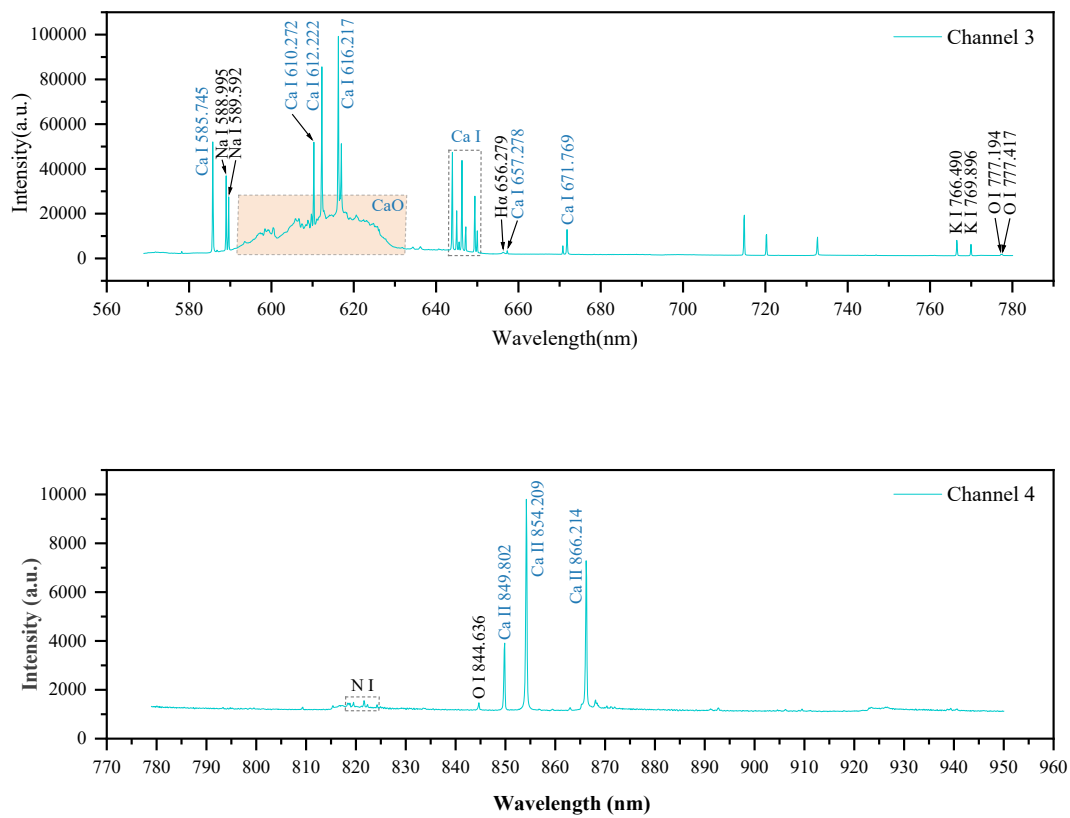

Fig. S2 LIBS spectra of lead chrome-green powder.

### 3 PCA models

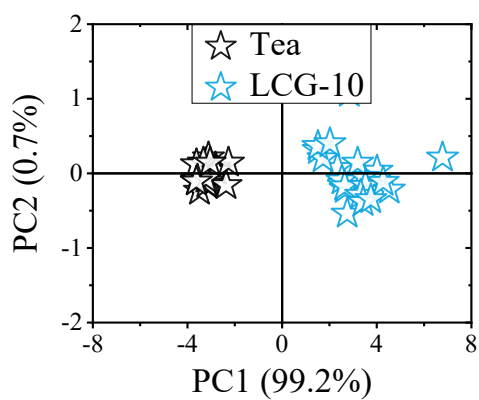

Fig. S3 PCA model based on CN radical characteristic spectral lines.

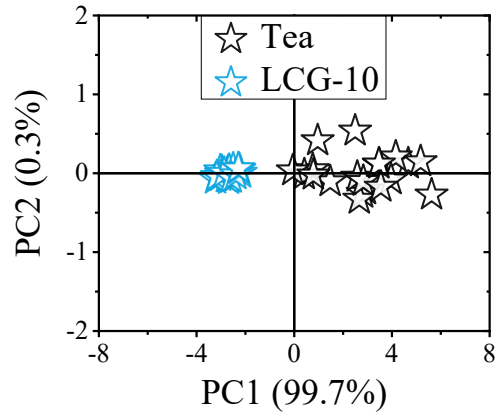

Fig. S4 PCA model based on CaO radical characteristic spectral lines.

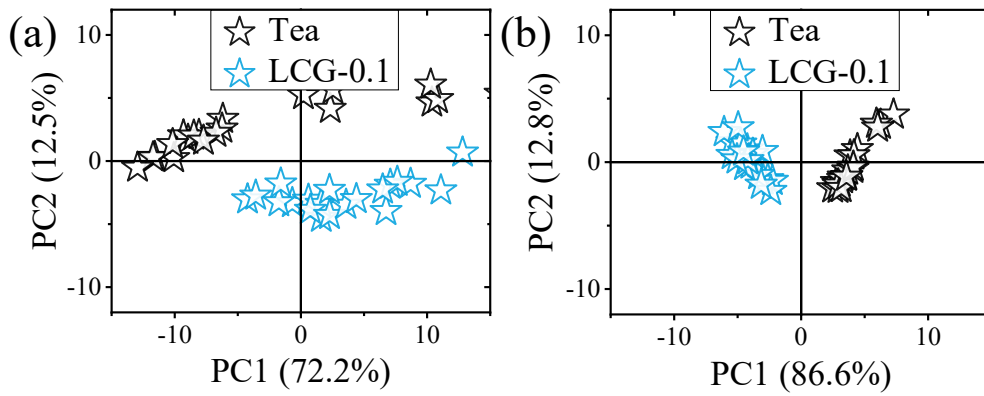

Fig. S5 PCA model based on (a) all characteristic spectral lines (b) CN and CaO radical characteristic spectral lines.

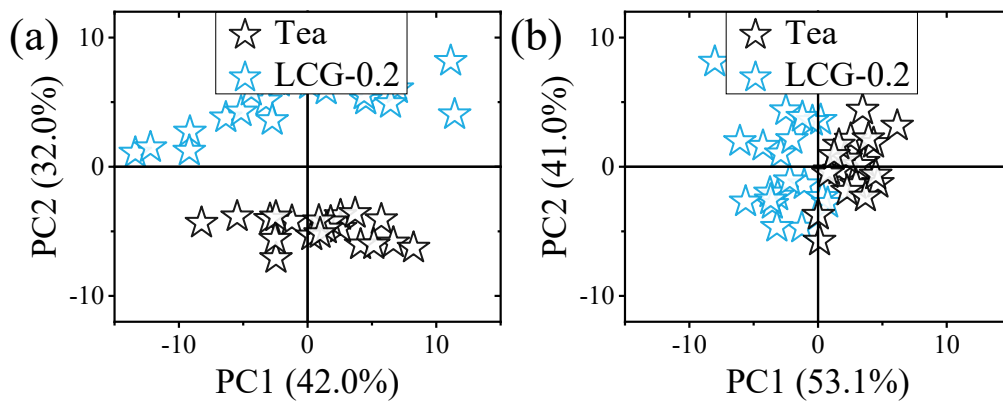

Fig. S6 PCA model based on (a) all characteristic spectral lines (b) CN and CaO radical

characteristic spectral lines.

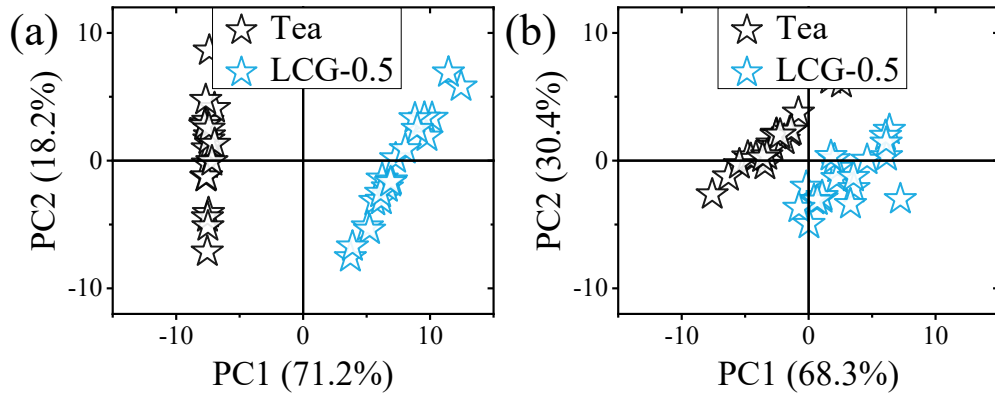

Fig. S7 PCA model based on (a) all characteristic spectral lines (b) CN and CaO radical characteristic spectral lines.

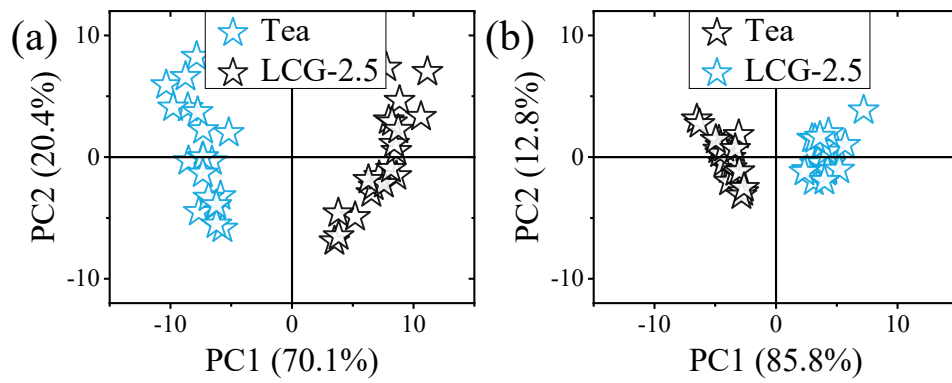

Fig. S8 PCA model based on (a) all characteristic spectral lines (b) CN and CaO radical characteristic spectral lines.

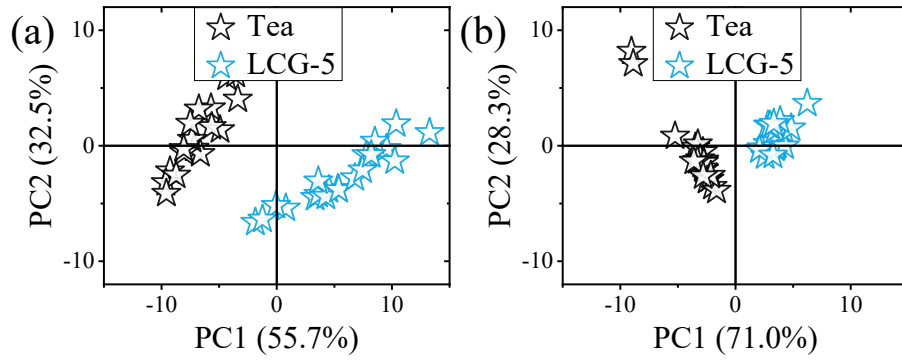

Fig. S9 PCA model based on (a) all characteristic spectral lines (b) CN and CaO radical characteristic spectral lines.

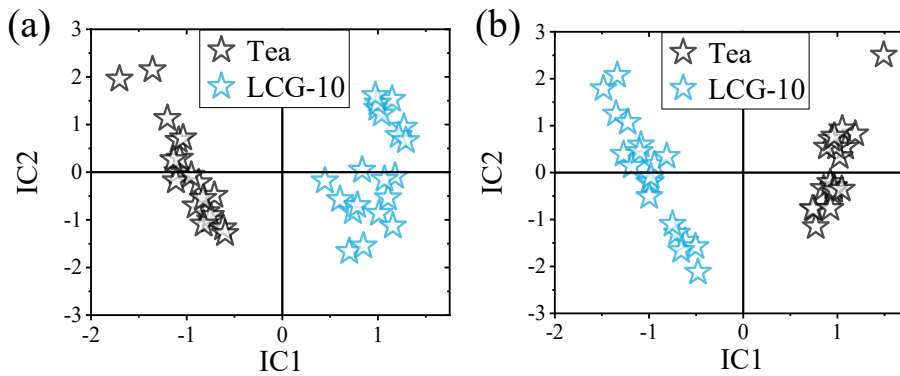

Fig. S10 ICA model based on (a) all characteristic spectral lines, (b) CN and CaO characteristic spectral lines.

Table S3. Coefficient matrix of PC1 and PC2 scores in Fig. 5(a).

| Elements and Wavelength (nm) | PC1      | PC2     | Elements and Wavelength (nm) | PC1      | PC2     |
|------------------------------|----------|---------|------------------------------|----------|---------|
| Al I 308.255                 | 0.11666  | 0.08776 | Mg I 518.32                  | 0.11561  | 0.09066 |
| Al I 309.304                 | 0.11577  | 0.08921 | Ca I 585.756                 | -0.11655 | 0.0817  |
| Ca II 315.916                | -0.11014 | 0.08746 | Na I 589.002                 | 0.10272  | 0.08581 |
| Ca II 317.992                | -0.1054  | 0.09743 | Na I 589.625                 | 0.10209  | 0.07776 |
| Cu I 324.783                 | -0.11748 | 0.07364 | Ca I 610.317                 | -0.11957 | 0.06502 |
| Cu I 327.431                 | -0.11902 | 0.06986 | Ca I 612.263                 | -0.12069 | 0.06354 |
| Fe I 357.014                 | 0.11723  | 0.06641 | Ca I 616.263                 | -0.12053 | 0.06782 |
| Cr I 360.583                 | 0.01276  | 0.18841 | Ca I 643.965                 | -0.11796 | 0.08453 |
| Fe I 363.085                 | -0.1136  | 0.10879 | Ca I 645.015                 | -0.11771 | 0.07701 |

|       |         |          |         |       |         |          |         |
|-------|---------|----------|---------|-------|---------|----------|---------|
| Pb I  | 368.375 | 0.02465  | 0.21542 | Ca I  | 646.298 | -0.11813 | 0.08233 |
| Fe I  | 370.683 | -0.07215 | 0.17224 | Ca I  | 647.229 | -0.11476 | 0.08501 |
| Fe I  | 373.772 | 0.00533  | 0.2156  | Ca I  | 649.436 | -0.11556 | 0.0895  |
| Mg I  | 383.241 | 0.12107  | 0.06865 | Ca I  | 650.015 | -0.10901 | 0.10475 |
| Mg I  | 383.86  | 0.12042  | 0.07253 | H I   | 656.361 | 0.12269  | 0.05114 |
| Si I  | 390.628 | 0.11824  | 0.08011 | Ca I  | 657.28  | 0.11405  | 0.07898 |
| Ca II | 393.369 | 0.06591  | 0.17977 | N I   | 742.454 | 0.12404  | 0.04255 |
| Al I  | 394.43  | 0.11718  | 0.08088 | N I   | 744.329 | 0.12431  | 0.04097 |
| Al I  | 396.169 | 0.11724  | 0.08524 | N I   | 746.882 | 0.12417  | 0.04226 |
| Ca II | 396.848 | 0.0422   | 0.20732 | K I   | 766.592 | 0.11267  | 0.06493 |
| Mn I  | 403.133 | 0.11797  | 0.07861 | K I   | 769.94  | 0.10665  | 0.078   |
| Mn I  | 403.355 | 0.11566  | 0.08826 | O I   | 777.277 | 0.12419  | 0.04245 |
| Mn I  | 403.504 | 0.11698  | 0.08434 | O I   | 777.549 | 0.12397  | 0.04347 |
| Pb I  | 405.799 | 0.03463  | 0.20817 | N I   | 818.58  | 0.12386  | 0.03844 |
| Sr II | 407.788 | 0.11084  | 0.10131 | N I   | 818.896 | 0.1239   | 0.03609 |
| Sr I  | 421.588 | 0.11734  | 0.08507 | N I   | 820.053 | 0.12061  | 0.05874 |
| Ca I  | 422.722 | 0.01354  | 0.21432 | N I   | 821.102 | 0.12251  | 0.04906 |
| Cr I  | 425.473 | -0.04688 | 0.17107 | N I   | 821.731 | 0.12421  | 0.03187 |
| Ca I  | 428.342 | -0.1139  | 0.11143 | N I   | 822.359 | 0.12368  | 0.0407  |
| Ca I  | 428.969 | -0.11523 | 0.10593 | N I   | 824.343 | 0.12392  | 0.03385 |
| Ca I  | 429.942 | -0.11437 | 0.10904 | O I   | 844.679 | 0.12417  | 0.03986 |
| Ca I  | 430.289 | -0.10856 | 0.12779 | Ca II | 849.759 | -0.09513 | 0.16134 |
| Ca I  | 430.843 | -0.10583 | 0.13626 | Ca II | 854.195 | -0.05316 | 0.2203  |
| Ca I  | 431.88  | -0.11394 | 0.11029 | N I   | 856.836 | 0.12355  | 0.03774 |
| Cr I  | 452.653 | -0.08156 | 0.18669 | N I   | 859.461 | 0.12409  | 0.03883 |
| Ca I  | 457.849 | -0.10123 | 0.13852 | N I   | 863.034 | 0.12433  | 0.0347  |
| Ca I  | 458.084 | -0.1067  | 0.12844 | Ca II | 866.29  | -0.05231 | 0.22445 |
| Ca I  | 458.554 | -0.11279 | 0.10674 | N I   | 868.099 | 0.1246   | 0.03531 |
| Sr I  | 460.739 | 0.08539  | 0.14111 | N I   | 868.384 | 0.12413  | 0.03923 |
| Ca I  | 487.818 | -0.081   | 0.17913 | N I   | 870.373 | 0.12379  | 0.04277 |
| Si II | 504.127 | -0.10131 | 0.14359 | N I   | 871.222 | 0.12412  | 0.03903 |
| Mg I  | 516.697 | 0.11792  | 0.08404 | N I   | 871.975 | 0.12398  | 0.03472 |
| Mg I  | 517.239 | 0.1156   | 0.0911  | N I   | 873.009 | 0.1181   | 0.04069 |

Table S4. Coefficient matrix of PC1 and PC2 scores in Fig. 5(b).

| Free Radical and<br>Wavelength (nm) |  | PC1      | PC2     |
|-------------------------------------|--|----------|---------|
| CN 357.908                          |  | 0.21441  | 0.1698  |
| CN 358.152                          |  | 0.21983  | 0.20232 |
| CN 385.098                          |  | 0.21964  | 0.20497 |
| CN 386.178                          |  | 0.21991  | 0.20076 |
| CN 387.179                          |  | 0.21968  | 0.20345 |
| CN 388.331                          |  | 0.21962  | 0.2048  |
| CN 415.217                          |  | 0.21911  | 0.20312 |
| CN 415.794                          |  | 0.2186   | 0.21403 |
| CN 416.729                          |  | 0.2181   | 0.22431 |
| CN 418.093                          |  | 0.21769  | 0.22786 |
| CN 419.737                          |  | 0.21825  | 0.22482 |
| CaO 596.822                         |  | -0.21746 | 0.23515 |
| CaO 598.427                         |  | -0.2174  | 0.23502 |
| CaO 600.399                         |  | -0.2173  | 0.23731 |
| CaO 603.35                          |  | -0.21728 | 0.23884 |
| CaO 605.923                         |  | -0.21783 | 0.2274  |
| CaO 606.657                         |  | -0.21791 | 0.22672 |
| CaO 620.726                         |  | -0.21799 | 0.22535 |
| CaO 622.408                         |  | -0.21827 | 0.22043 |
| CaO 623.128                         |  | -0.21813 | 0.22143 |
| CaO 624.805                         |  | -0.21808 | 0.22211 |

#### 4 LIBS spectra of three different brands of Tieguanyin tea

Except for the Wuhu brand Tieguanyin, we purchased two different brands of Tieguanyin tea, Zhongminhongtai and Changxiangyi, also from Anxi County, Quanzhou City, Fujian Province. The new brands of tea were pressed into pellets and tested, and the LIBS spectra were compared with Tieguanyin of Wuhu brand. Three brands of Tieguanyin tea were simply referred to as W Sample, Z Sample and C Sample. And the LIBS spectra of the three samples were shown in Fig. S11.



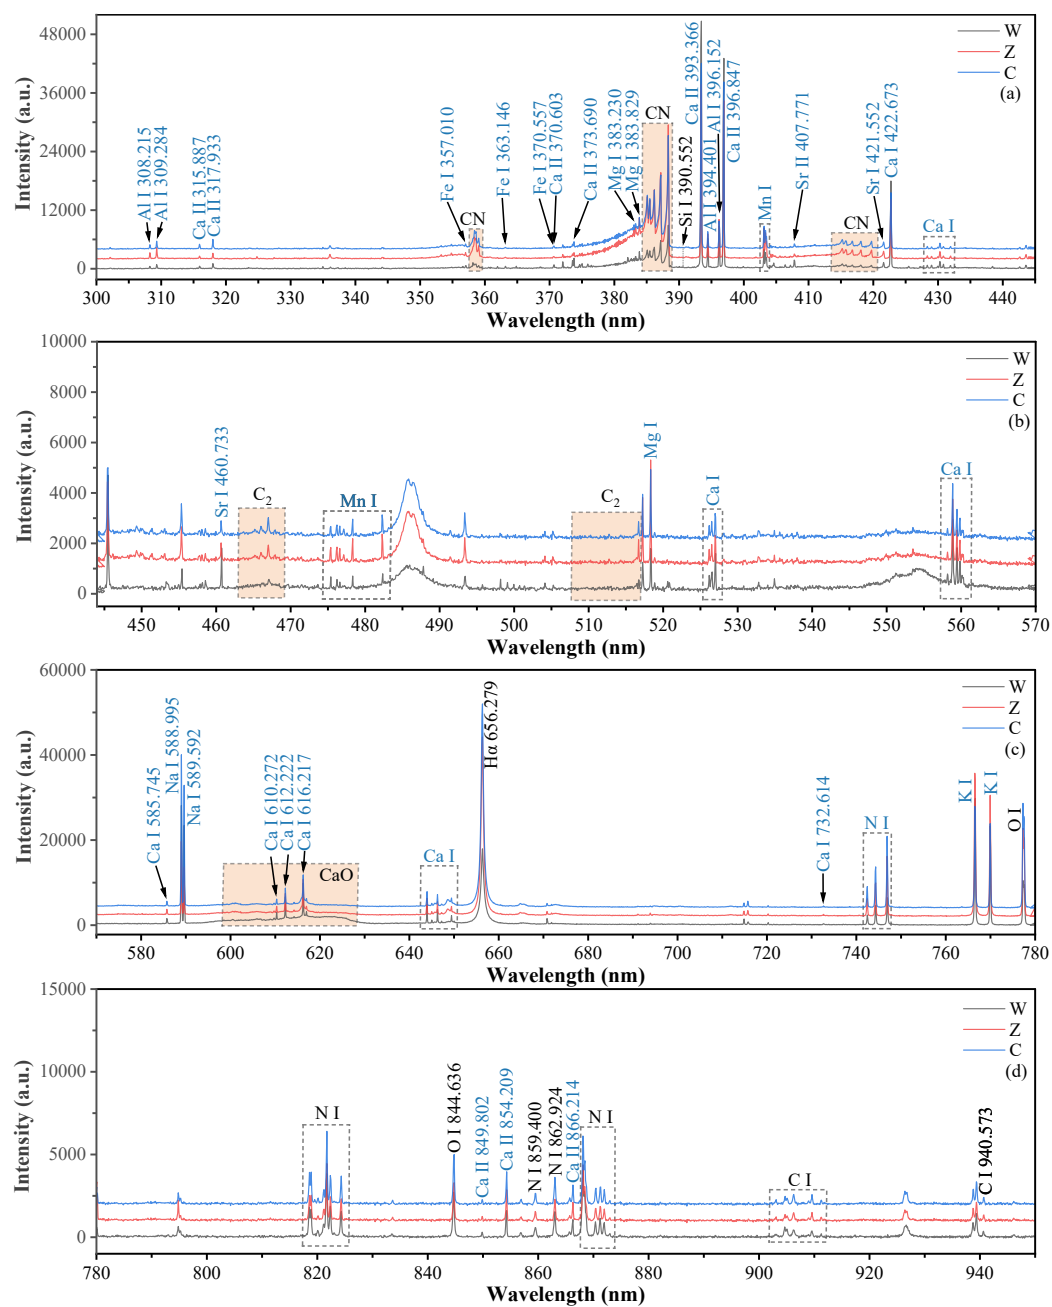

Fig. S11 LIBS spectra of three different brands of Tieguanyin tea.

## 5 Results of ICP-OES

Table S5. Test results of ICP-OES.

| Sample         | Element | Content (ppm) |
|----------------|---------|---------------|
| Tieguanyin tea | Ca      | 14873.1       |
|                | Cr      | 8.9           |

|       |    |          |
|-------|----|----------|
|       | Pb | 0.2      |
| □     | □  |          |
| LCG-5 | Ca | 16614.3  |
|       | Cr | 18.1     |
|       | Pb | 38.3     |
| □     | □  |          |
| LCG   | Ca | 419000.0 |
|       | Cr | 280.3    |
|       | Pb | 1094.5   |

## 6 Plasma parameter

Table S6. The electron density ( $N_e$ ) and plasma temperature ( $T$ ) of LCG-tea samples.

| Sample         | $T$ (K) | $N_e$ ( $10^{17} \text{ cm}^{-3}$ ) |
|----------------|---------|-------------------------------------|
| Tieguanyin tea | 8159.7  | 1.44103                             |
| LCG-0.1        | 9018    | 2.8378                              |
| LCG-0.2        | 9125.23 | 2.95197                             |
| LCG-0.5        | 9019.16 | 2.80142                             |
| LCG-2.5        | 8819.65 | 2.35454                             |
| LCG-5          | 8457.27 | 1.88431                             |
| LCG-10         | 8026.06 | 1.0796                              |
| LCG            | 7266.4  | 0.981364                            |

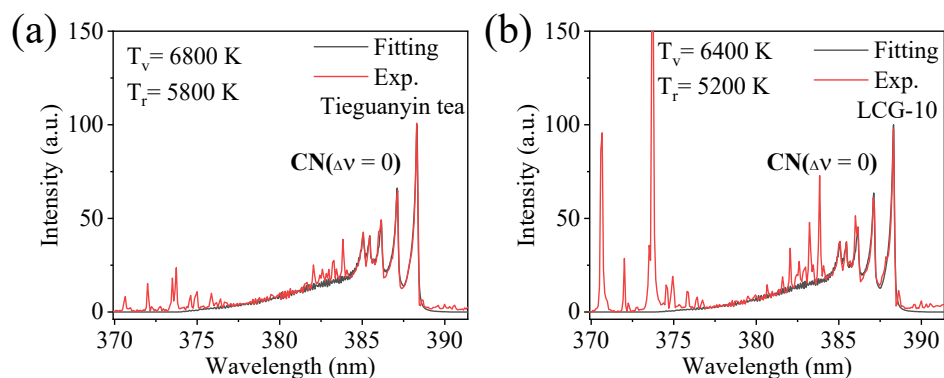

Fig. S12 Fitting spectral lines CN ( $\Delta v = 0$ ) of Tieguanyin and LCG-10 by LIFBASE.

## 7 Calculation the LoD of Pb with $\text{PbI}_2$

During the growth of tea trees, Pb and Cr elements will be enriched in leaves. If the local air, water or soil pollution is serious, the Pb content in tea may exceed the food safety requirements.<sup>1</sup> Therefore, the detection limit of Pb element obtained by LIBS technique has important reference value. LCG is a mixture of lead chrome yellow and iron blue or phthalocyanine blue,<sup>2</sup> and the exact ratio is unknown. Moreover, the proportion of LCG attached to tea leaves was unknown, so the

content and the detection limit of Pb element cannot be obtained by using LCG. In order to obtain the detection limit of Pb element, tea with different Pb content were obtained by preparing PbI<sub>2</sub> solutions with different concentrations.

In order to quantitatively calculate the detection limit of Pb element, the known Pb content and the corresponding Pb I 405.781 nm spectral line intensity are used to construct the calibration curve which is the relationship between the intensity and the concentration of the element.<sup>3,4</sup>

The detection limit is defined as:<sup>5</sup>

$$\alpha_{LOD} = \frac{3\sigma}{S} \quad (1)$$

In the formula,  $\sigma$  is the standard deviation of background signal intensity in the spectrum, and  $S$  is the slope of the calibration curve of the target element.

Fig. S13(a) shows the Pb I spectral lines of PbI<sub>2</sub>-tea with different Pb contents. The spectral line intensities of Pb I (368.346 nm and 405.781 nm) weakened with the decrease of Pb content. When the Pb content decreased to 10 ppm or below, the spectral line of Pb I was almost not observed. Fig. S13(b) shows the calibration curve of Pb I 405.781 nm spectral line in the PbI<sub>2</sub>-tea. The contents of Pb element used to establish calibration curves were 50, 100, 1000 and 10000 ppm respectively, and RSDs of Pb I 405.781 nm were 3.39%, 2.80%, 2.52% and 2.88%, respectively, which were lower than 5%. The determination coefficient  $R^2$  of the fitting curve was 0.994, indicating that the calibration curve fitting result was good. According to the equation (1), the detection limit of Pb was  $39 \pm 1.4$  ppm, which was better than 48.4 ppm reported by other research groups.<sup>1</sup>

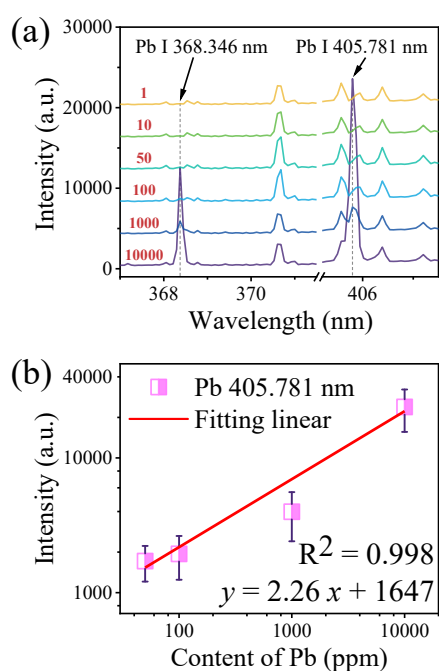

Fig. S13 (a) Pb I spectral lines of PbI<sub>2</sub>-tea with different Pb contents (ppm), (b) calibration curve of Pb I 405.781 nm in PbI<sub>2</sub>-tea.

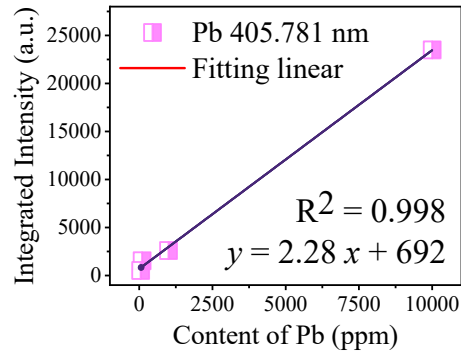

Fig. S14 Calibration curve established using the integrated intensity of Pb I 405.781 nm.

## Reference

1. X. Lu, Y. Z. Liu, Q. H. Zhang and L. Li, *Laser Phys. Lett.*, 2020, **17**(1), 8.
2. L. Y. Chen, C. Y. Lu and X. Liu, *Tropical Agricultural Engineering*, 2008, **32**(1), 38–40, 44.
3. M. A. Gondal, Y. B. Habibullah, U. Baig and L. E. Oloore, *Talanta*, 2016, **152**, 341-352.
4. F. Yang, L. Jiang, S. M. Wang, Z. T. Cao, L. Liu, M. M. Wang and Y. F. Lu, *Opt. Laser Technol.*, 2017, **93**, 194-200.
5. X. S. Wang, S. S. Wan, Y. G. He, S. L. Qiu, X. Ma, N. Wazir, R. B. Liu and Y. X. Tian, *Spectroc. Acta Pt. B-Atom. Spectr.*, 2021, **178**, 106123.
